# Supplementary material for: Structure optimization of dendritic lipopeptide based gene vectors with the assistance from molecular dynamic simulation
Source: Royal Society of Chemistry journal article supplement (doi:10.1039/c8tb02650e), 2018-11-30
Supplement: c8tb02650e1.pdf [file c8tb02650e1.pdf]

## **Electronic Supplementary Information**

### **Structure optimization of dendritic lipopeptide based gene vectors with the assistance from molecular dynamic simulation**

Hong Liang<sup>†</sup>, Ao Hu<sup>†</sup>, Xiaobing Chen, Rongrong Jin, Kefeng Wang\*, Bowen Ke, Yu Nie\*

National Engineering Research Center for Biomaterials, Sichuan University, No. 29, Wangjiang Road,  
Chengdu 610064, P. R. China.

\*E-mail: nie\_yu@scu.edu.cn; fencal@scu.edu.cn

Fax: +86-28-8541-0246; Tel: +86-28-8541-2848

<sup>†</sup>Dual contributors

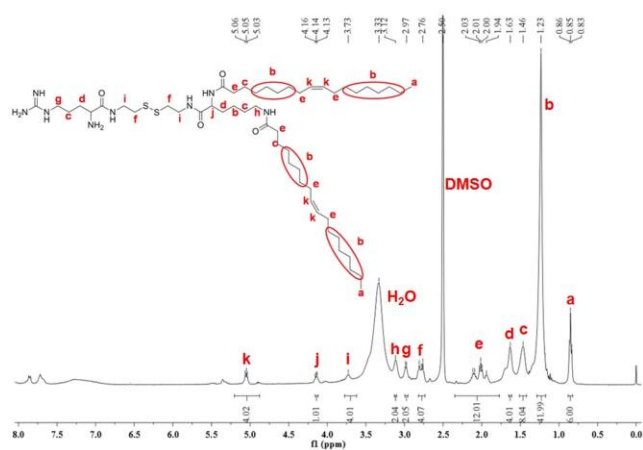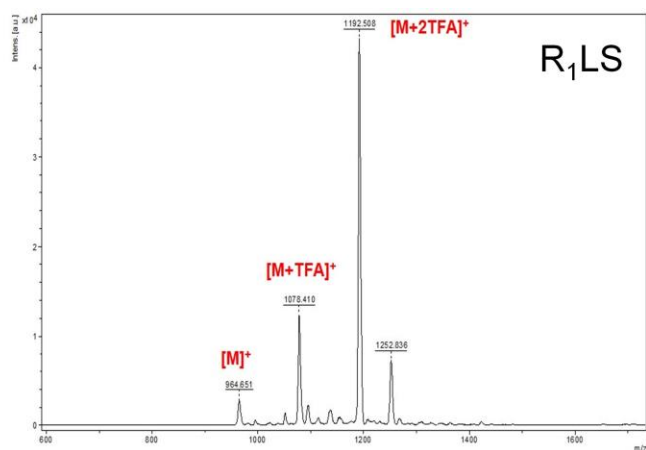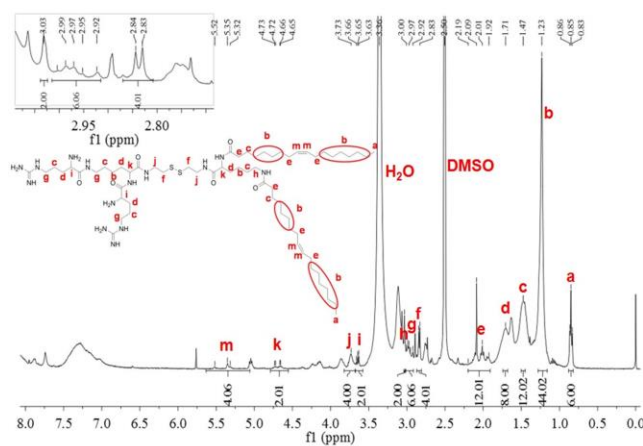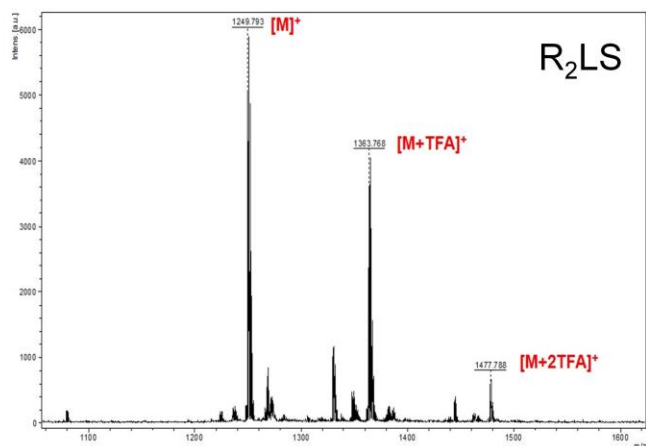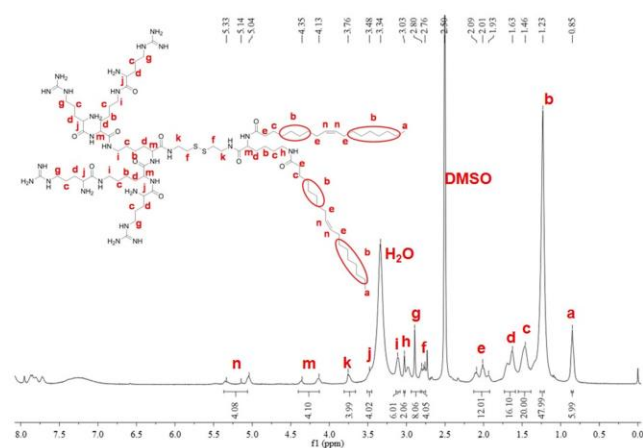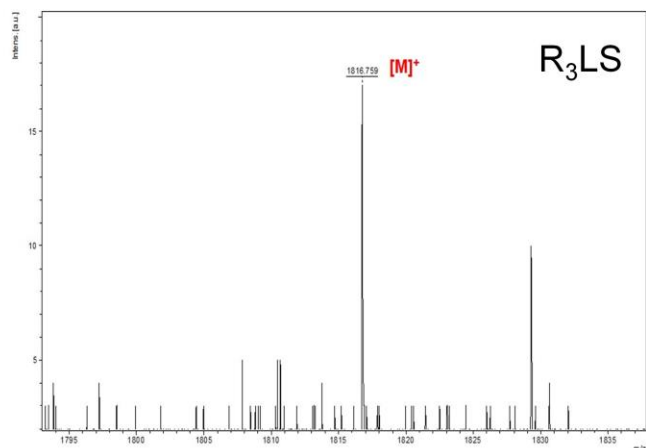

Fig. S1 Nuclear magnetic resonance ( $^1\text{H}$  NMR) and mass spectrometry (MALDI-TOF-MS) of  $\text{R}_{1/2/3}\text{LS}$  molecules.

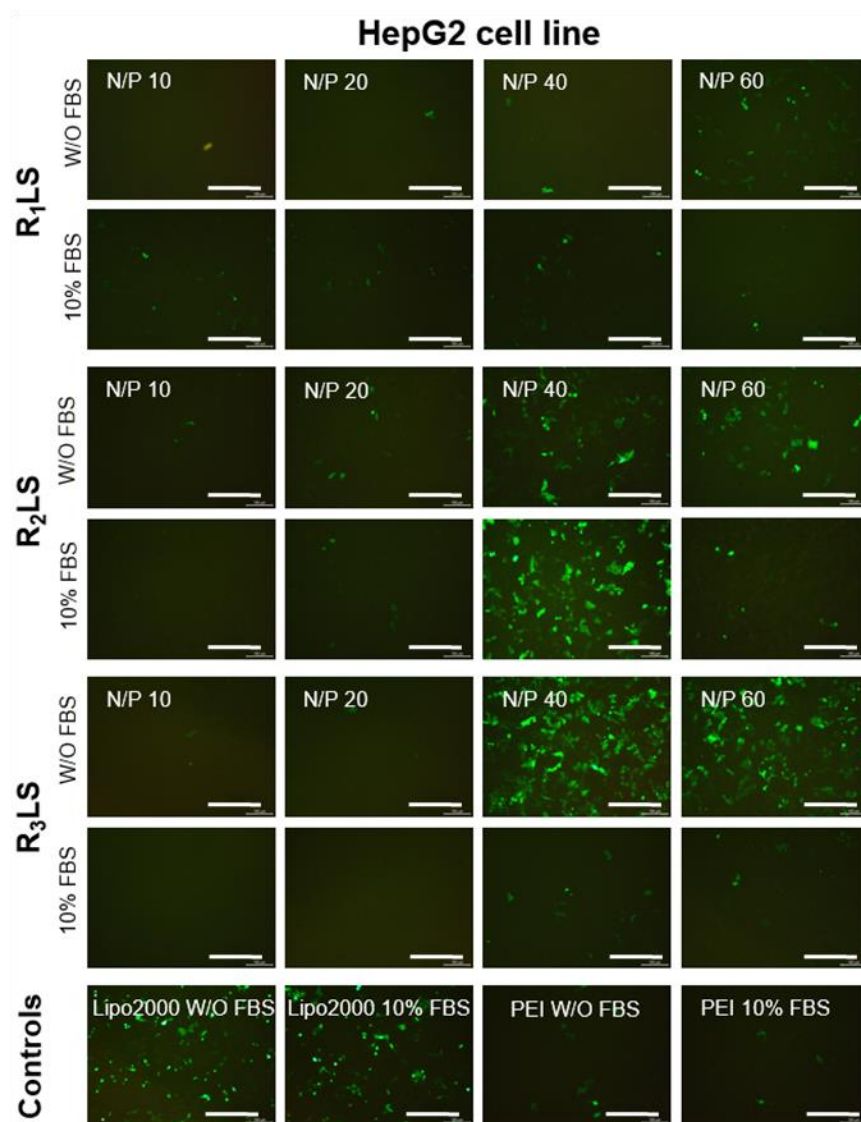

Fig. S2 *In vitro* transfection efficiency of different generation dendritic peptides. Green fluorescence proteins were expressed on HepG2 cell lines with 10 % FBS or without FBS. The N/P ratio of PEI/DNA was 10. Scale bar is 100  $\mu$ m.

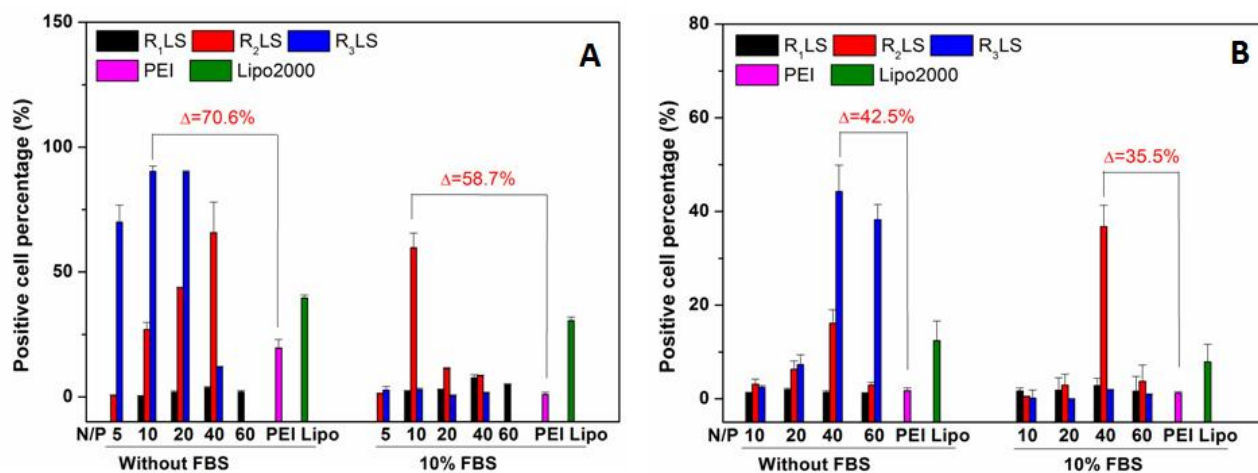

Fig. S3 The semi-quantitative evaluation of transfection efficiency *in vitro*. (A) Hela cell lines, (B) HepG2 cell lines. " $\Delta$ " represents the difference value.

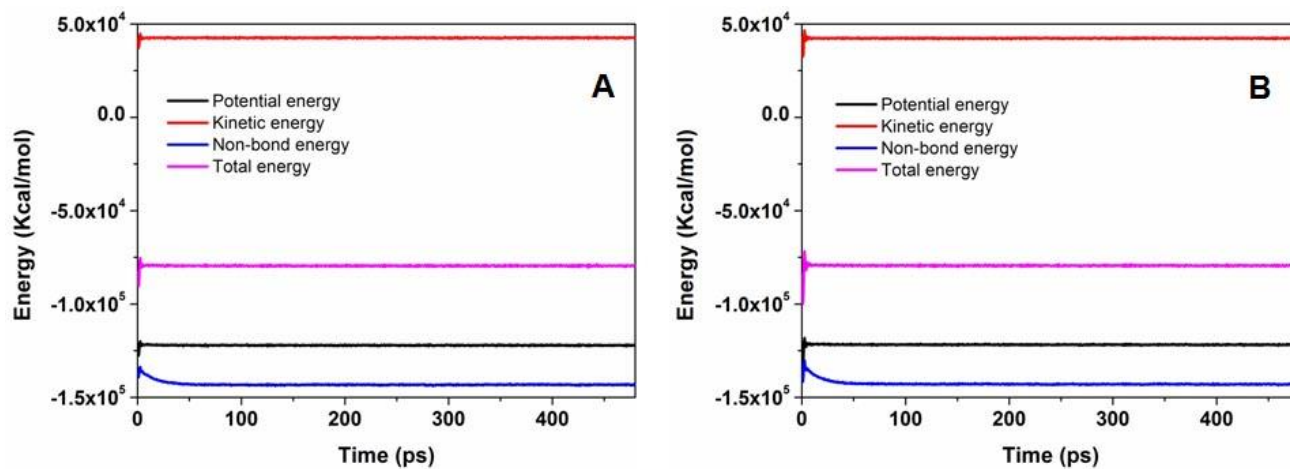

Fig. S4 The tendency of energy change for R<sub>2</sub>LS system during 500 ps, (A) a couple of molecular system; (B) multiple molecular system. (R<sub>1</sub>LS and R<sub>3</sub>LS system were similar as R<sub>2</sub>LS system.)

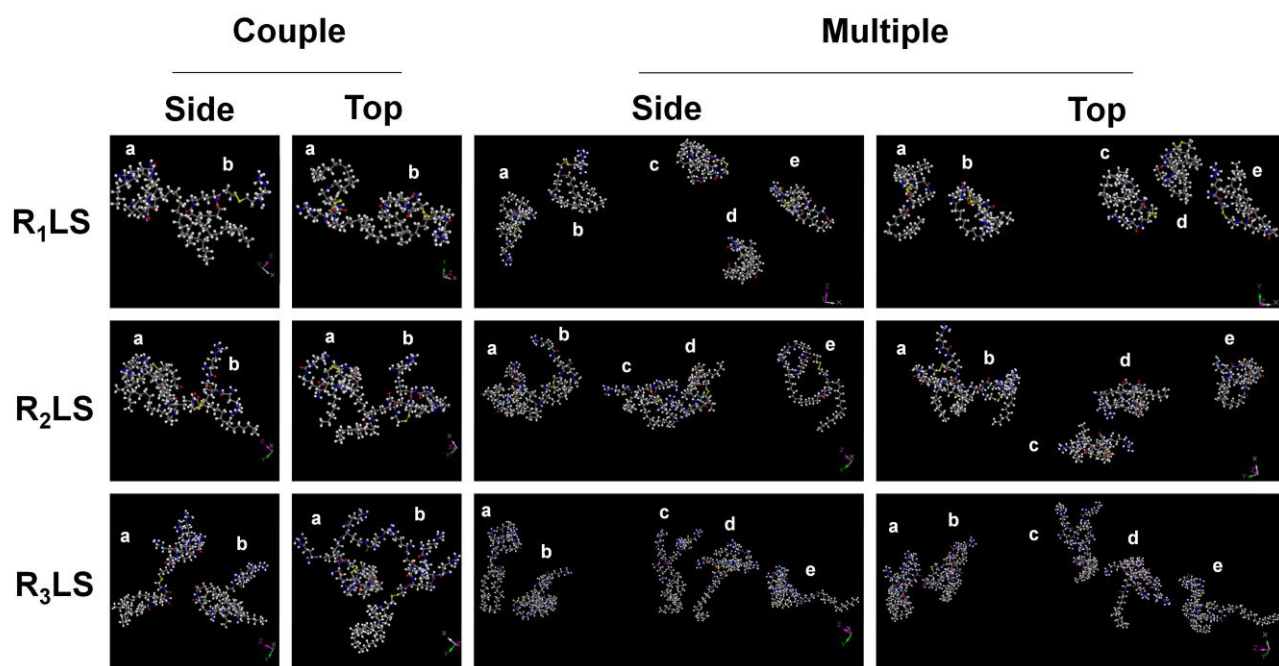

Fig. S5 The results of intermolecular interaction at 500 ps by molecular dynamic simulation. The left two lines were the intermediate states of couple molecules simulation for  $R_{1/2/3}LS$  (the two molecules were marked by a and b). The right two lines were the intermediate states of five molecules simulation for  $R_{1/2/3}LS$  (the five molecules were marked by a, b, c, d, e, respectively).
